# Supplementary material for: Estimating Sustainable Live-Coral Harvest at Kamiali Wildlife Management Area, Papua New Guinea
Source: PLoS One. 2015 Oct 5;10(10):e0140026. doi: 10.1371/journal.pone.0140026 (PMC4593639; doi:10.1371/journal.pone.0140026)
Supplement: S2 File — “Tag #” = specimen number; “L1-t0 (cm)” = major axis length of specimen, in centimeters, at start of year; “L2-t0 (cm)” = minor axis length of specimen, in centimeters, at start of year; “L1-t1 (cm)” = length of major axis of specimen, in centimeters, at end of year; “L2-t1 (cm)” = length of minor axis of specimen, in centimeters, at end of year; “Reef Zone” = habitat category (reef flat, reef crest, fore reef). Blank values in L1-t1 (cm) and L2-t1 (cm) indicate the colony was not found at the end of the year; zero values in the same columns indicate the colony was found, but that it was completely dead. (XLS) [file pone.0140026.s002.xls]

## Sheet: Sheet1
Tag #	L1-t0 (cm)	L2-t0 (cm)	L1-t1 (cm)	L2-t2 (cm)	Reef Zone
1	36	22	42	32	Reef Flat
2	28	24	0	0	Reef Flat
3	45	37			Reef Flat
4	50	25	57	50	Reef Flat
5	18	9	24	18	Reef Flat
6	14	12	18	13	Reef Crest
7	46	18	47	23	Reef Crest
8	28	18	28	15	Reef Crest
9	13	10	18	17	Reef Crest
10	30	21			Reef Crest
11	22	19	29	25	Fore Reef
12	37	15			Fore Reef
13	17	13			Fore Reef
14	27	22			Fore Reef
15	37	19	39	29	Fore Reef
16	32	17			Fore Reef
17	20	13			Fore Reef
18	21	14	26	19	Fore Reef
19	25	13			Fore Reef
20	30	22			Fore Reef
21	25	22			Reef Flat
22	38	25			Reef Flat
23	38	26	54	41	Reef Flat
24	15	10	18	15	Reef Flat
25	86	45	96	73	Reef Flat
26	33	11			Reef Crest
27	36	15	20	18	Reef Crest
28	14	8			Reef Crest
29	19	16	23	22	Reef Crest
30	72	28	82	76	Reef Crest
31	17	10	21	15	Fore Reef
32	23	17			Fore Reef
33	23	15			Fore Reef
34	71	36			Fore Reef
35	44	31	46	30	Fore Reef
36	18	12			Fore Reef
37	34	20	36	25	Fore Reef
38	24	17			Fore Reef
39	25	13	24	10	Fore Reef
40	65	41			Fore Reef
41	15	13			Reef Flat
42	9	9	12	10	Reef Flat
43	31	22	35	23	Reef Flat
44	31	21	33	25	Reef Flat
45	56	33	0	0	Reef Flat
46	31	25			Reef Crest
47	61	36			Reef Crest
48	21	18	20	8	Reef Crest
49	48	20	51	42	Reef Crest
50	28	33			Reef Crest
51	23	16			Fore Reef
52	24	22	28	27	Fore Reef
53	41	31			Fore Reef
54	29	29			Fore Reef
55	75	58			Fore Reef
56	49	29	0	0	Fore Reef
57	24	21			Fore Reef
58	21	13			Fore Reef
59	23	17			Fore Reef
60	36	21	42	21	Fore Reef
61	56	46	0	0	Reef Flat
62	34	22			Reef Flat
63	13	12			Reef Flat
64	33	37			Reef Flat
65	26	16	31	20	Reef Flat
66	26	19			Reef Flat
67	21	15	28	25	Reef Flat
68	24	18	35	25	Reef Flat
69	24	25			Reef Flat
70	36	33			Reef Flat
71	16	14			Fore Reef
72	12	11			Fore Reef
73	54	18	60	31	Fore Reef
74	32	20	38	28	Fore Reef
75	39	30	42	32	Fore Reef
76	41	31	43	32	Fore Reef
77	23	17	28	20	Fore Reef
78	66	28			Fore Reef
79	33	31	37	33	Fore Reef
80	14	14			Fore Reef
81	22	13			Reef Flat
82	40	23			Reef Flat
83	23	8	0	0	Reef Flat
84	14	10	27	18	Reef Flat
85	23	17			Reef Flat
86	25	17			Reef Crest
87	9	8			Reef Crest
88	39	30	25	24	Reef Crest
89	20	18	42	15	Reef Crest
90	27	22			Reef Crest
91	47	33			Fore Reef
92	19	16	29	20	Fore Reef
93	22	23			Fore Reef
94	36	33	14	10	Fore Reef
95	17	11	27	17	Fore Reef
96	24	19			Fore Reef
97	36	24			Fore Reef
98	37	33	22	15	Fore Reef
99	25	23			Fore Reef
100	49	37			Fore Reef
101	42	38			Fore Reef
102	40	41			Fore Reef
103	43	40			Fore Reef
104	28	14			Fore Reef
105	32	30	44	35	Fore Reef
106	61	37	66	43	Fore Reef
107	52	47	54	52	Fore Reef
108	23	20			Fore Reef
109	19	10	28	22	Fore Reef
110	61	32	61	38	Fore Reef
111	24	22			Fore Reef
112	36	31	40	38	Fore Reef
113	48	31			Fore Reef
114	57	38	60	35	Fore Reef
115	15	12			Fore Reef
116	19	13			Fore Reef
117	27	18			Fore Reef
118	34	24			Fore Reef
119	23	16			Fore Reef
120	10	9			Fore Reef
121	37	22			Fore Reef
122	78	56			Fore Reef
123	24	23	0	0	Fore Reef
124	35	26	49	29	Fore Reef
125	19	15			Fore Reef
126	38	32	41	30	Fore Reef
127	23	11			Fore Reef
128	30	26			Fore Reef
129	47	27			Fore Reef
130	33	25	34	21	Fore Reef
131	43	34	50	28	Fore Reef
132	20	18			Fore Reef
133	38	30			Fore Reef
